# Supplementary material for: A UCP1-IRES-Cre Knock-In Mouse Enables Specific Brown Adipocyte Targeting Without CNS Off-Target Expression
Source: Research Square preprint supplement (doi:10.21203/rs.3.rs-9752374/v1), 2026-06-17
Supplement: Supplementary file 1 [file cff2788268d622885d3ed47f.docx]

**Supplementary Figure Legends:**

**Supplemental Figure 1. Reporter expression pattern in the parafascicular thalamic nucleus**.

Coronal 30 µm brain sections showing endogenous reporter expression (Ai14-tdTomato, red). **A1, A2:** Low magnification overview images of control (**A1**) and UCP1-IRES-Cre (**A2**) mice indicate the location of the parafascicular thalamic nucleus (PaF, boxed area). **B1, B2:** High-magnification images of the boxed area with lack of Ai14-tdTomato expression in control mice (**B1**), while scattered Ai14-tdTomato positive cells were observed in the PaF of some, but not all UCP1-IRES-Cre mice (**B2**). *Scale bars are 2.5 mm (A1, A2) or 500 um (B1, B2). dorsal third ventricle (D3V), fascicular retroflexus (fr)*

**Supplemental Figure 2. Germline Ai-tdTomato expression is detected only in male UCP1-IRES-Cre mice.** Paraffin-embedded 5 µm sections of female and male reproductive tissues were processed for H&E stain (**A1-D1**), anti-UCP1 protein (DAB) with hematoxylin counterstain (blue) (**A2-D2**) or anti-RFP detection of Ai-tdTomato (red) with DAPI (**A3-D3, E, F**) in control (**A1-3, C1-3**) and UCP1-IRES-Cre (**B1-3, D1-3, E, F**) mice. Lower magnification overviews show anatomical landmarks of reproductive tissues (female: ovary and oviduct with gonad-associated WAT (gWAT), males: testes, caput epidiymis and gWAT). Ai14-tdTomato reporter expression was absent in control gonads, but present in both female and male UCP1-IRES-cre gonads, whereas gWAT showed no reporter expression in either sex, consistent with a lack of detectable UCP1 protein. High magnification of female UCP1-IRES-cre ovaries (**E**) show prominent Ai14-tdTomato expression selectively in granulosa cells of preantral and antral follicles, while oocytes lacked detectable reporter expression. High magnification of male UCP1-IRES-cre testes (**F**) show robust Ai14-tdTomato expression selectively in the mature, elongated sperm. Note, the lack of DAPI stain consistent with the highly condensed DNA status. Cre-dependent reporter expression in female granulosa cells and mature sperm cells likely reflect transient developmental Ucp1 promoter activity rather than a sustained UCP1 protein expression which was absent in these cells.


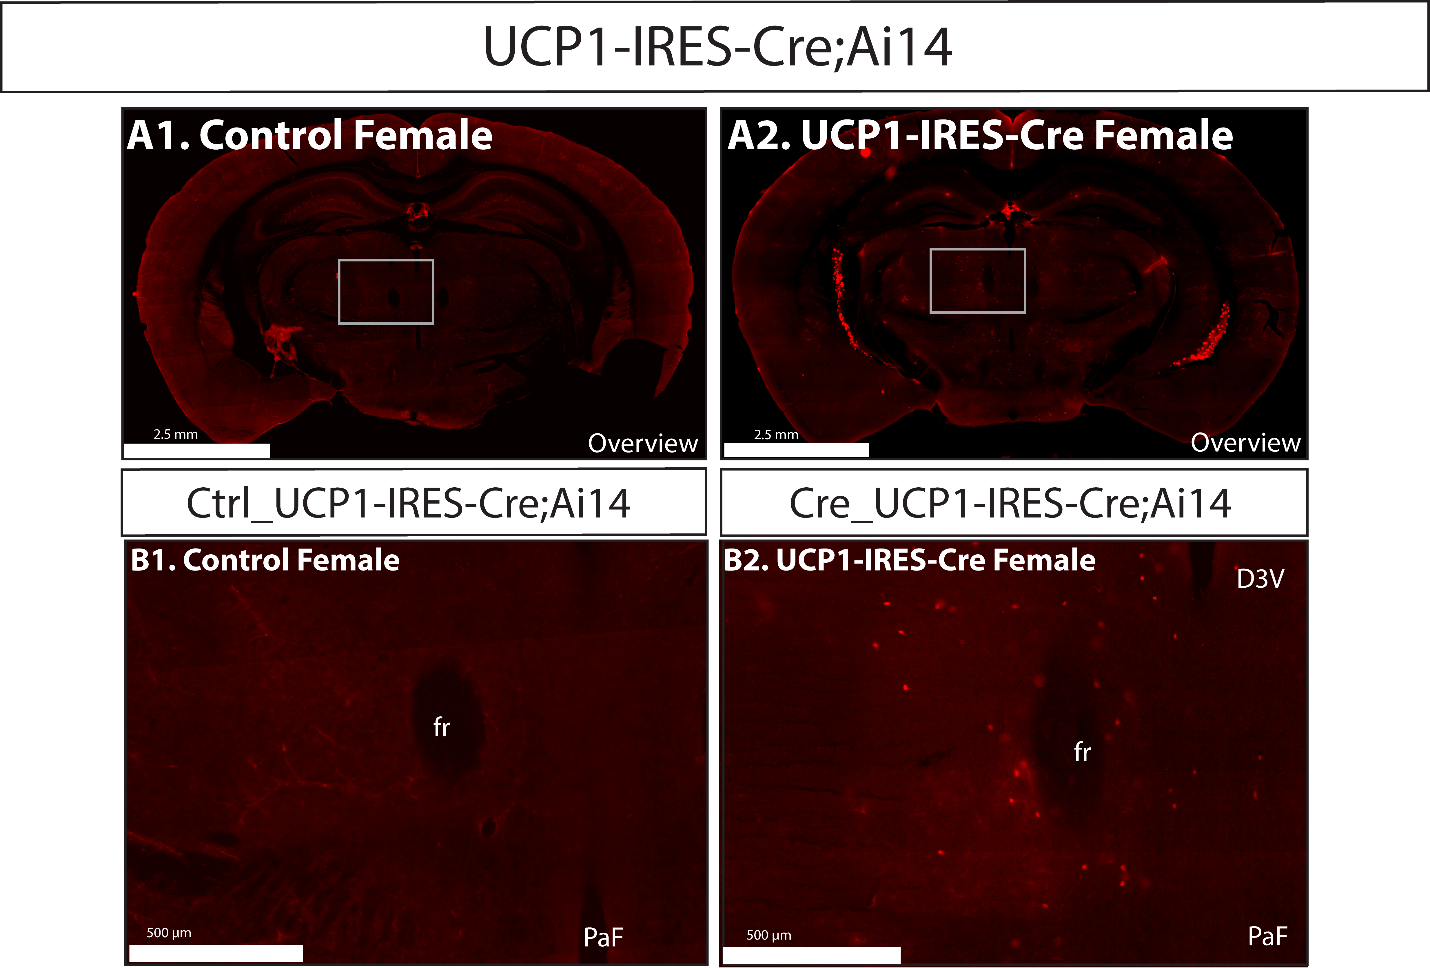


**Supplemental Figure 1.** **Reporter expression pattern in the parafascicular thalamic nucleus**. Coronal 30 µm brain sections showing endogenous reporter expression (Ai14-tdTomato, red). **A1, A2:** Low magnification overview images of control (**A1**) and UCP1-IRES-Cre (**A2**) mice indicate the location of the parafascicular thalamic nucleus (PaF, boxed area). **B1, B2:** High-magnification images of the boxed area with lack of Ai14-tdTomato expression in control mice (**B1**), while scattered Ai14-tdTomato positive cells were observed in the PaF of some, but not all UCP1-IRES-Cre mice (**B2**). *Scale bars are 2.5 mm (A1, A2) or 500 um (B1, B2). dorsal third ventricle (D3V), fascicular retroflexus (fr)*

**
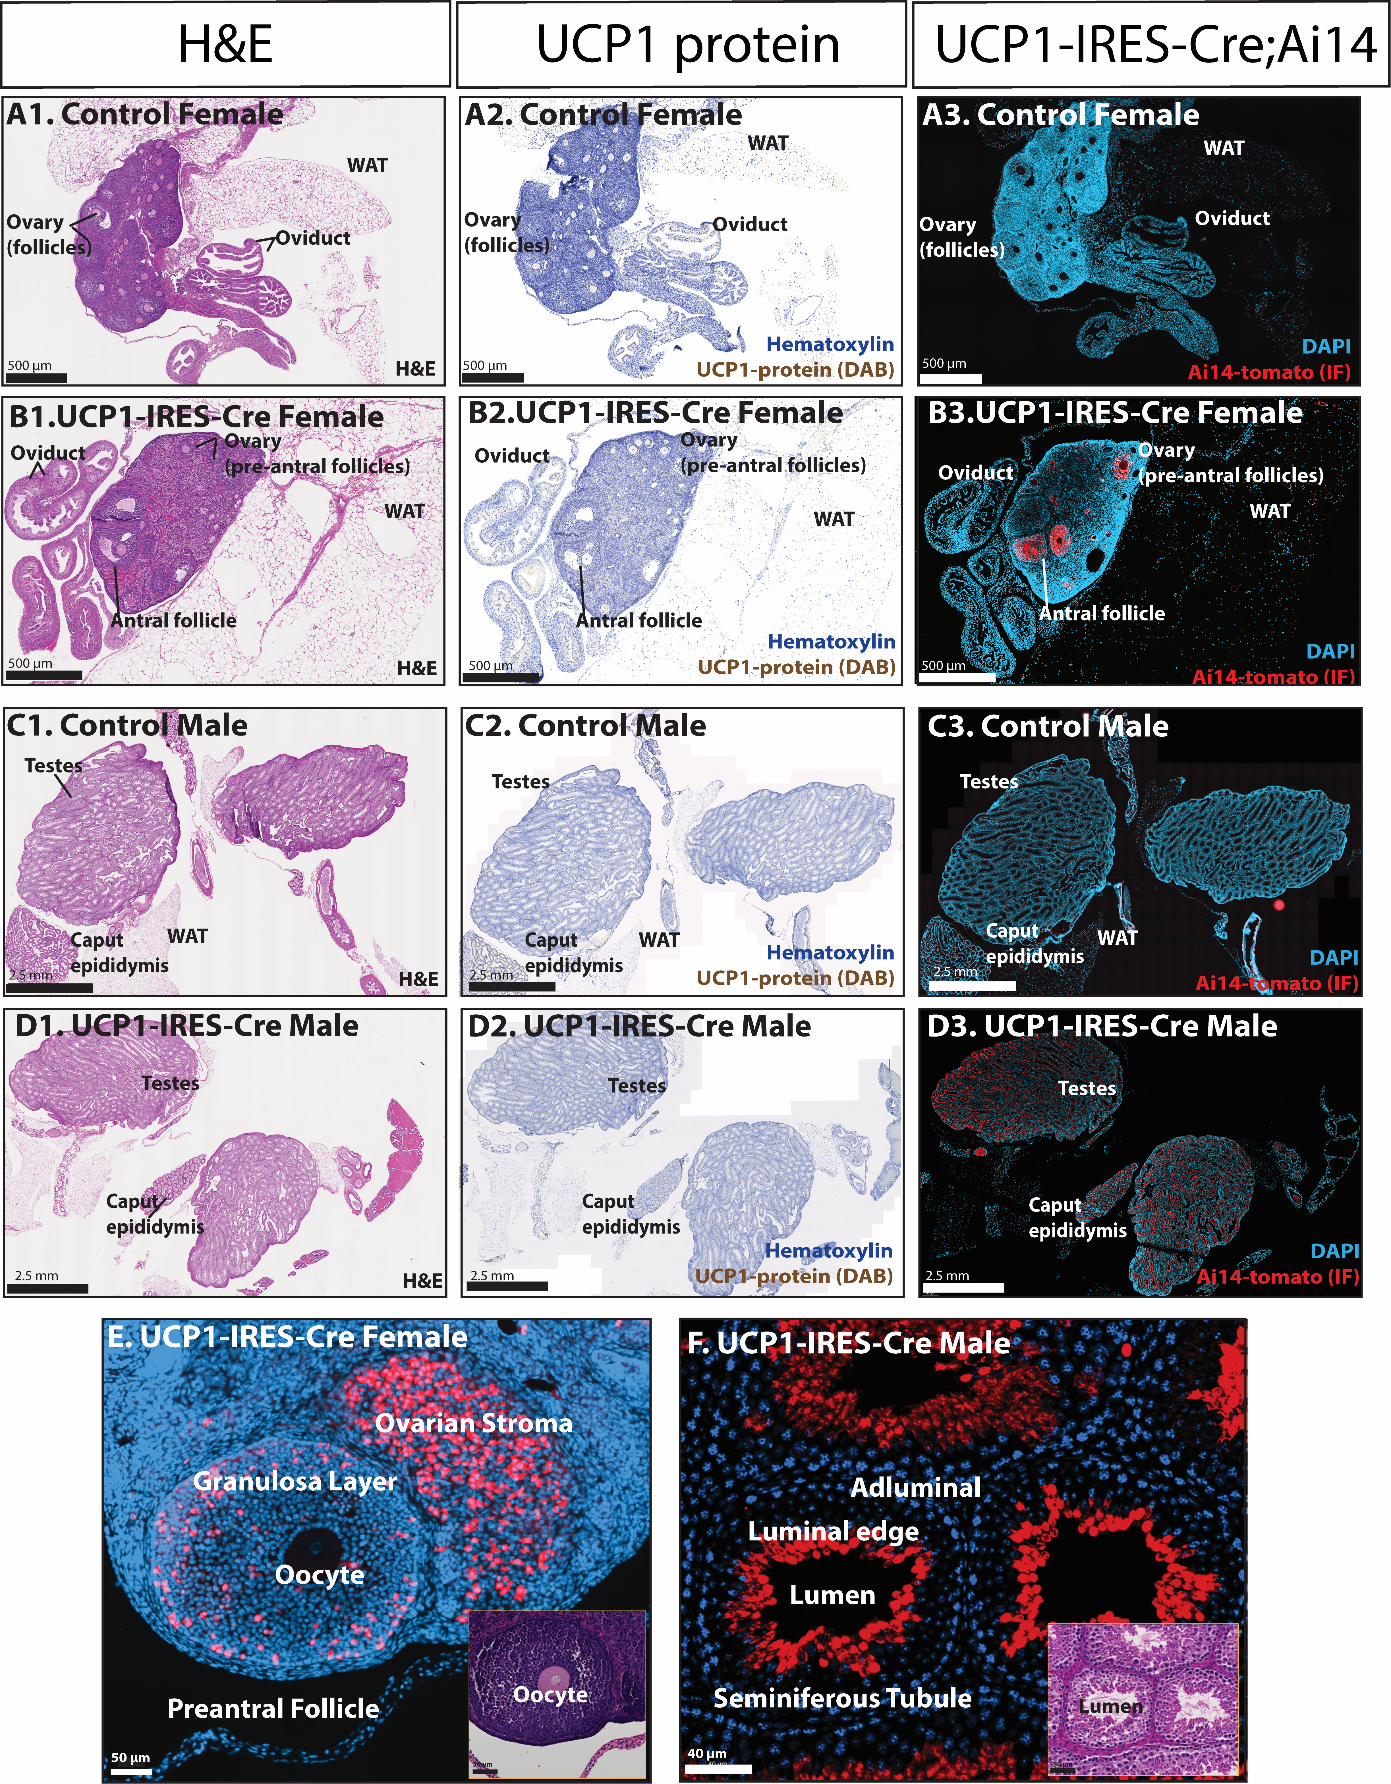
**

**Supplemental Figure 2.** **Germline Ai-tdTomato expression is detected only in male UCP1-IRES-Cre mice.** Paraffin-embedded 5 µm sections of female and male reproductive tissues were processed for H&E stain (**A1-D1**), anti-UCP1 protein (DAB) with hematoxylin counterstain (blue) (**A2-D2**) or anti-RFP detection of Ai-tdTomato (red) with DAPI (**A3-D3, E, F**) in control (**A1-3, C1-3**) and UCP1-IRES-Cre (**B1-3, D1-3, E, F**) mice. Lower magnification overviews show anatomical landmarks of reproductive tissues (female: ovary and oviduct with gonad-associated WAT (gWAT), males: testes, caput epidiymis and gWAT). Ai14-tdTomato reporter expression was absent in control gonads, but present in both female and male UCP1-IRES-cre gonads, whereas gWAT showed no reporter expression in either sex, consistent with a lack of detectable UCP1 protein. High magnification of female UCP1-IRES-cre ovaries (**E**) show prominent Ai14-tdTomato expression selectively in granulosa cells of preantral and antral follicles, while oocytes lacked detectable reporter expression. High magnification of male UCP1-IRES-cre testes (**F**) show robust Ai14-tdTomato expression selectively in the mature, elongated sperm. Note, the lack of DAPI stain consistent with the highly condensed DNA status. Cre-dependent reporter expression in female granulosa cells and mature sperm cells likely reflect transient developmental Ucp1 promoter activity rather than a sustained UCP1 protein expression which was absent in these cells.
